# Supplementary material for: Expression Atlas of the Deubiquitinating Enzymes in the Adult Mouse Retina, Their Evolutionary Diversification and Phenotypic Roles
Source: PubMed Central journal article supplement (PMC4774998; doi:10.1371/journal.pone.0150364), 2016-03-02
Supplement: pone.0150364.s001.pdf [file pone.0150364.s001.pdf]

### JAMM

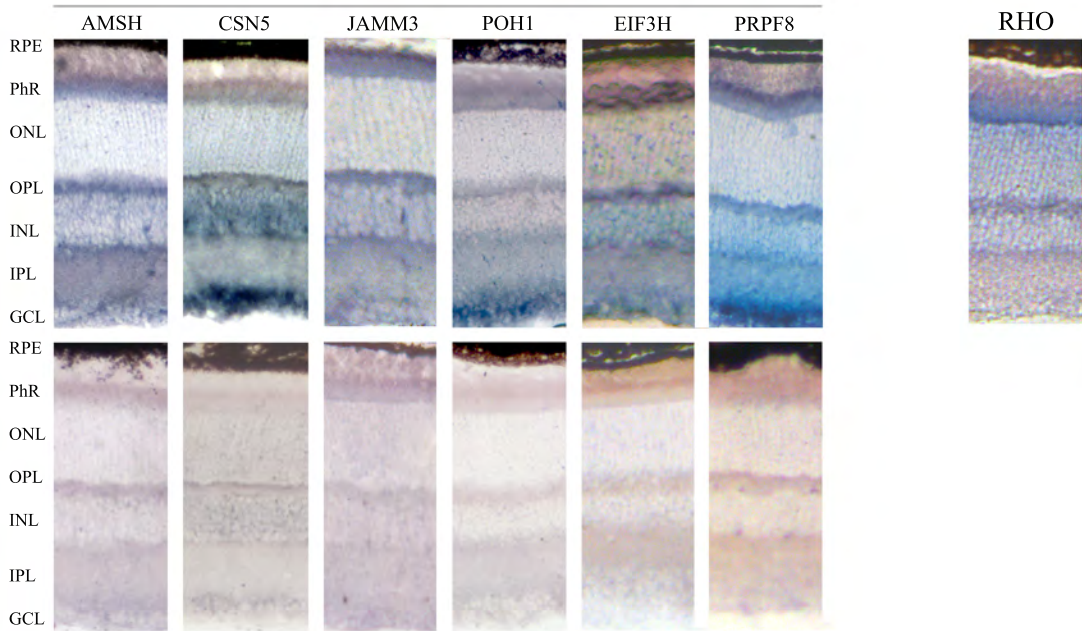

### MJD

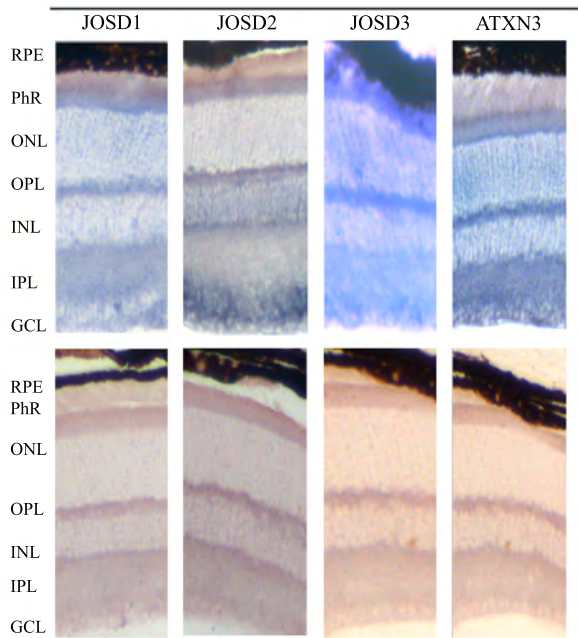

### UCH

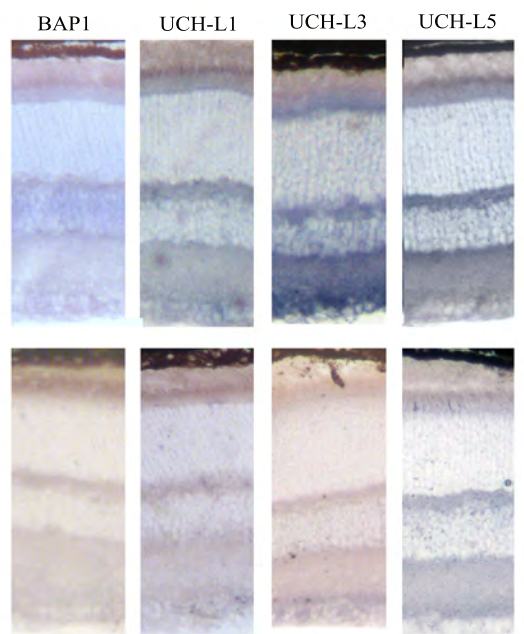

### OTU

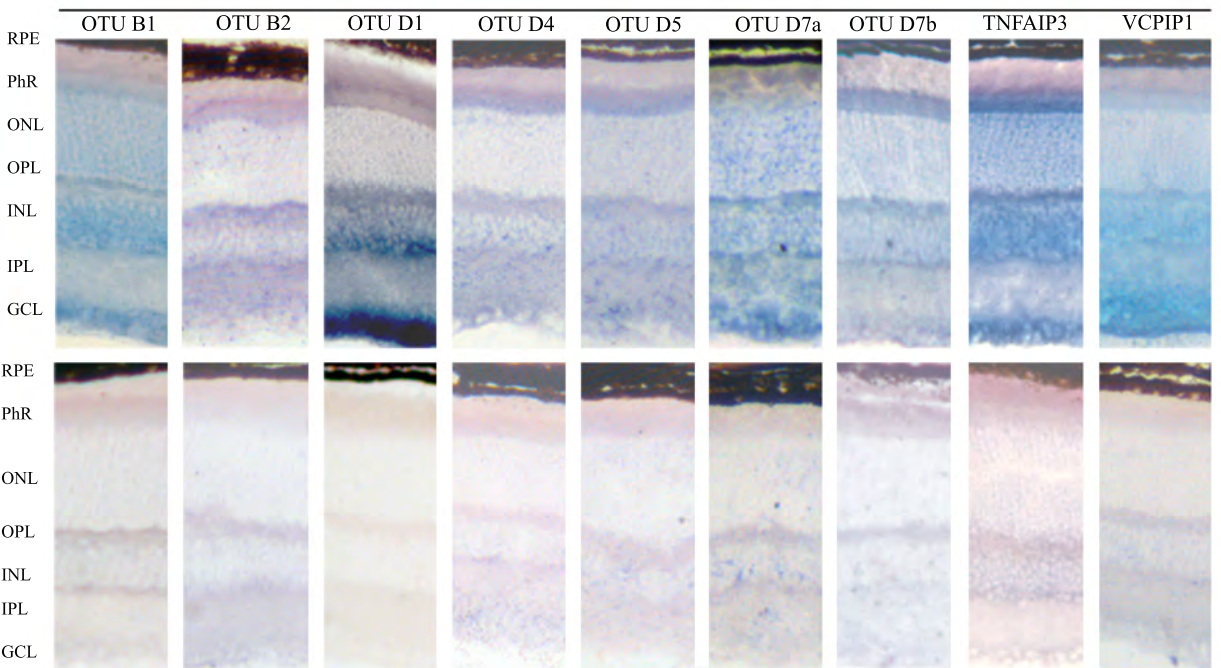

USP

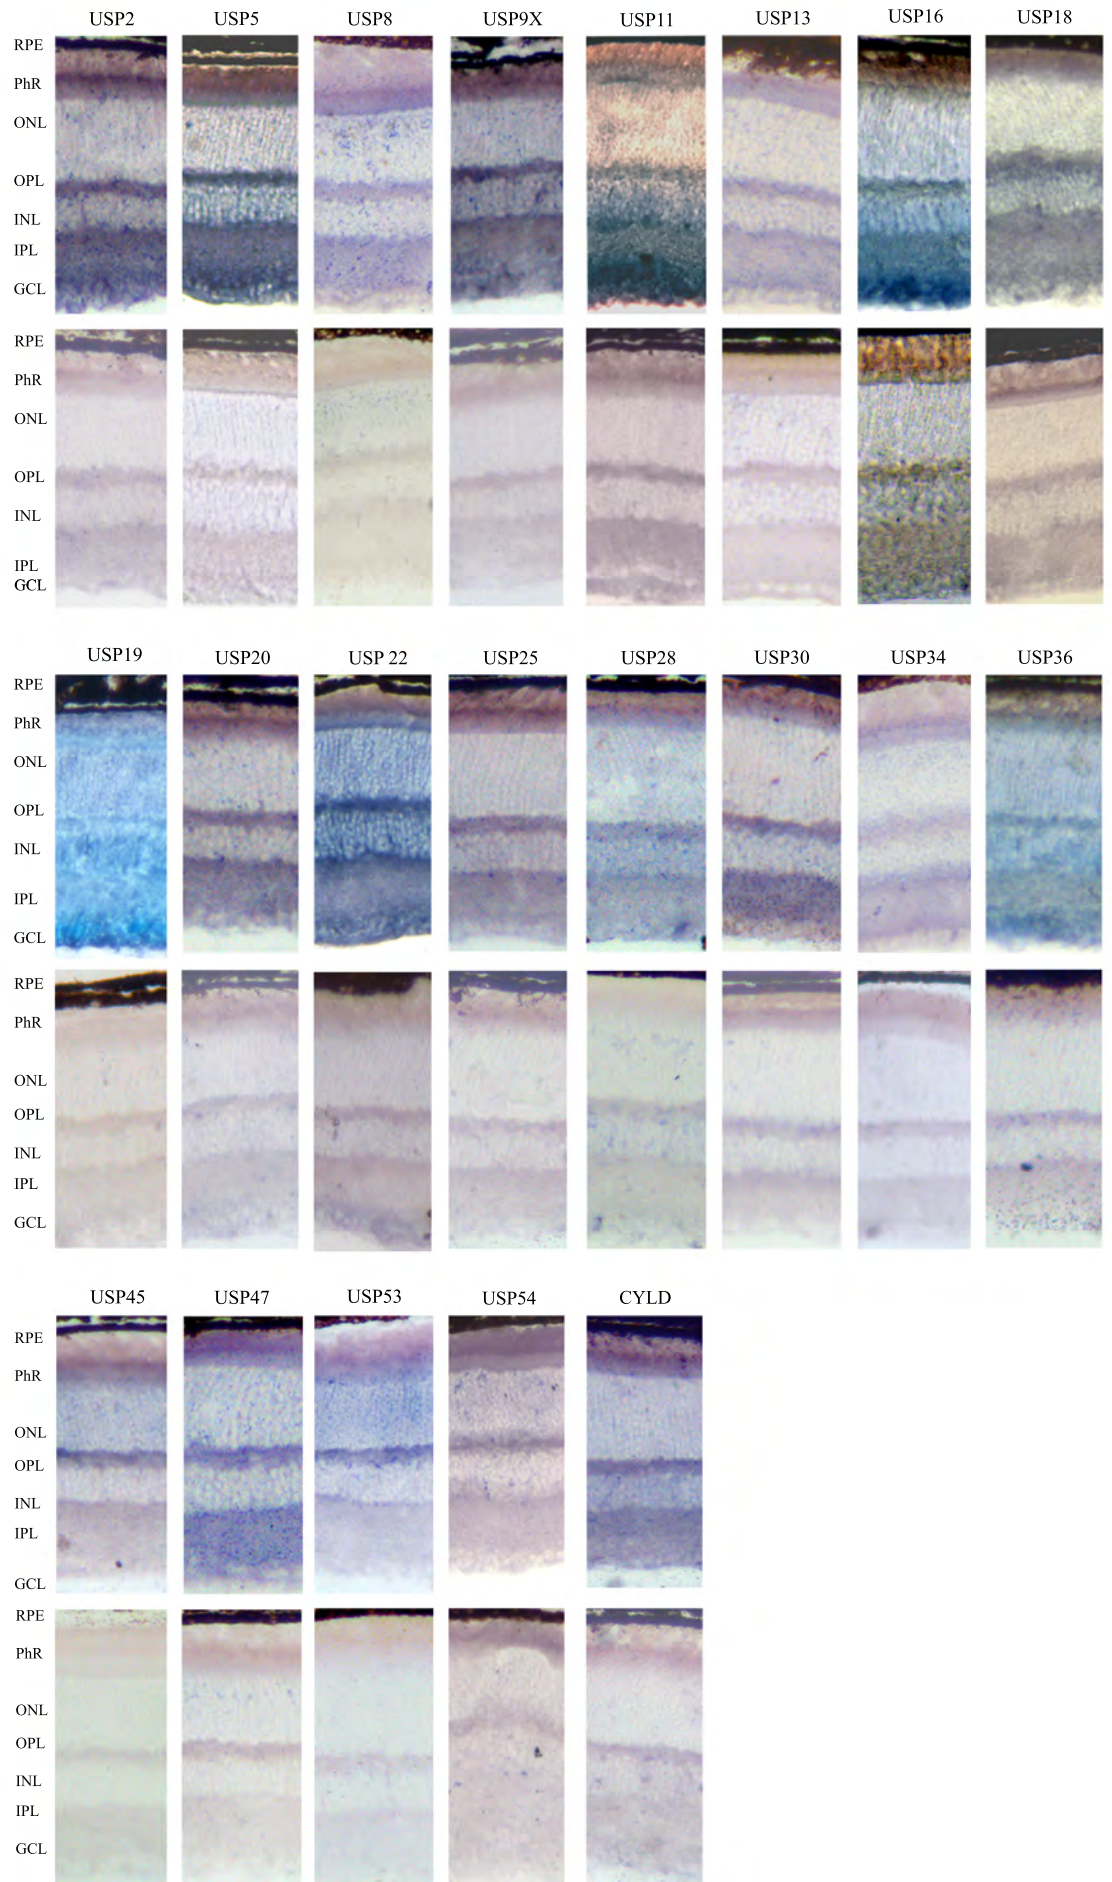

**S1 Fig. *In situ* hybridization of genes encoding DUB enzymes on mouse retina cryosections, with the comparison between antisense and sense riboprobes.**
