# Supplementary material for: Expression Atlas of the Deubiquitinating Enzymes in the Adult Mouse Retina, Their Evolutionary Diversification and Phenotypic Roles
Source: PubMed Central journal article supplement (PMC4774998; doi:10.1371/journal.pone.0150364), 2016-03-02
Supplement: pone.0150364.s002.pdf [file pone.0150364.s002.pdf]

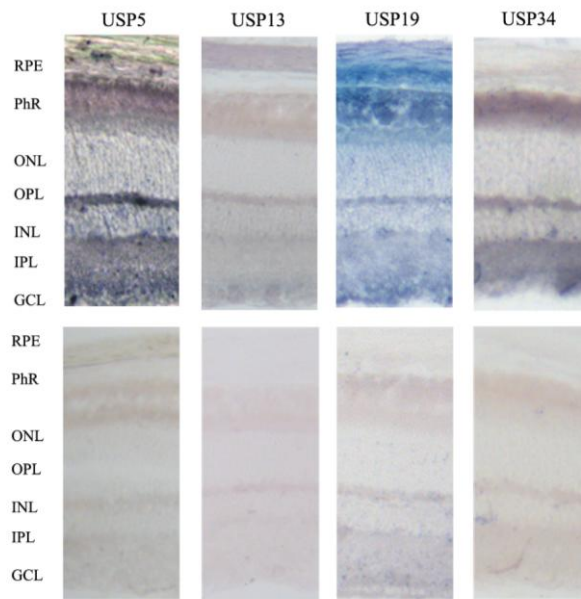

**Supplementary Figure 2.** *In situ* hybridization of genes encoding DUB enzymes on CD-1 (albino) mouse retina cryosections, using digoxigenin-labelled antisense riboprobes (top panels in each row) and their corresponding sense riboprobes (negative controls) stained for the same length of time (lower panels in each row). **RPE**- Retinal pigmented epithelium; **Phr**- Photoreceptor cell layer; **ONL**- Outer nuclear layer; **OPL**. Outer plexiform layer; **INL**- Inner nuclear layer, **IPL**- Inner plexiform layer; **GCL**- Ganglion cell layer.
