# Supplementary material for: Expression Atlas of the Deubiquitinating Enzymes in the Adult Mouse Retina, Their Evolutionary Diversification and Phenotypic Roles
Source: PubMed Central journal article supplement (PMC4774998; doi:10.1371/journal.pone.0150364), 2016-03-02
Supplement: pone.0150364.s003.pdf [file pone.0150364.s003.pdf]

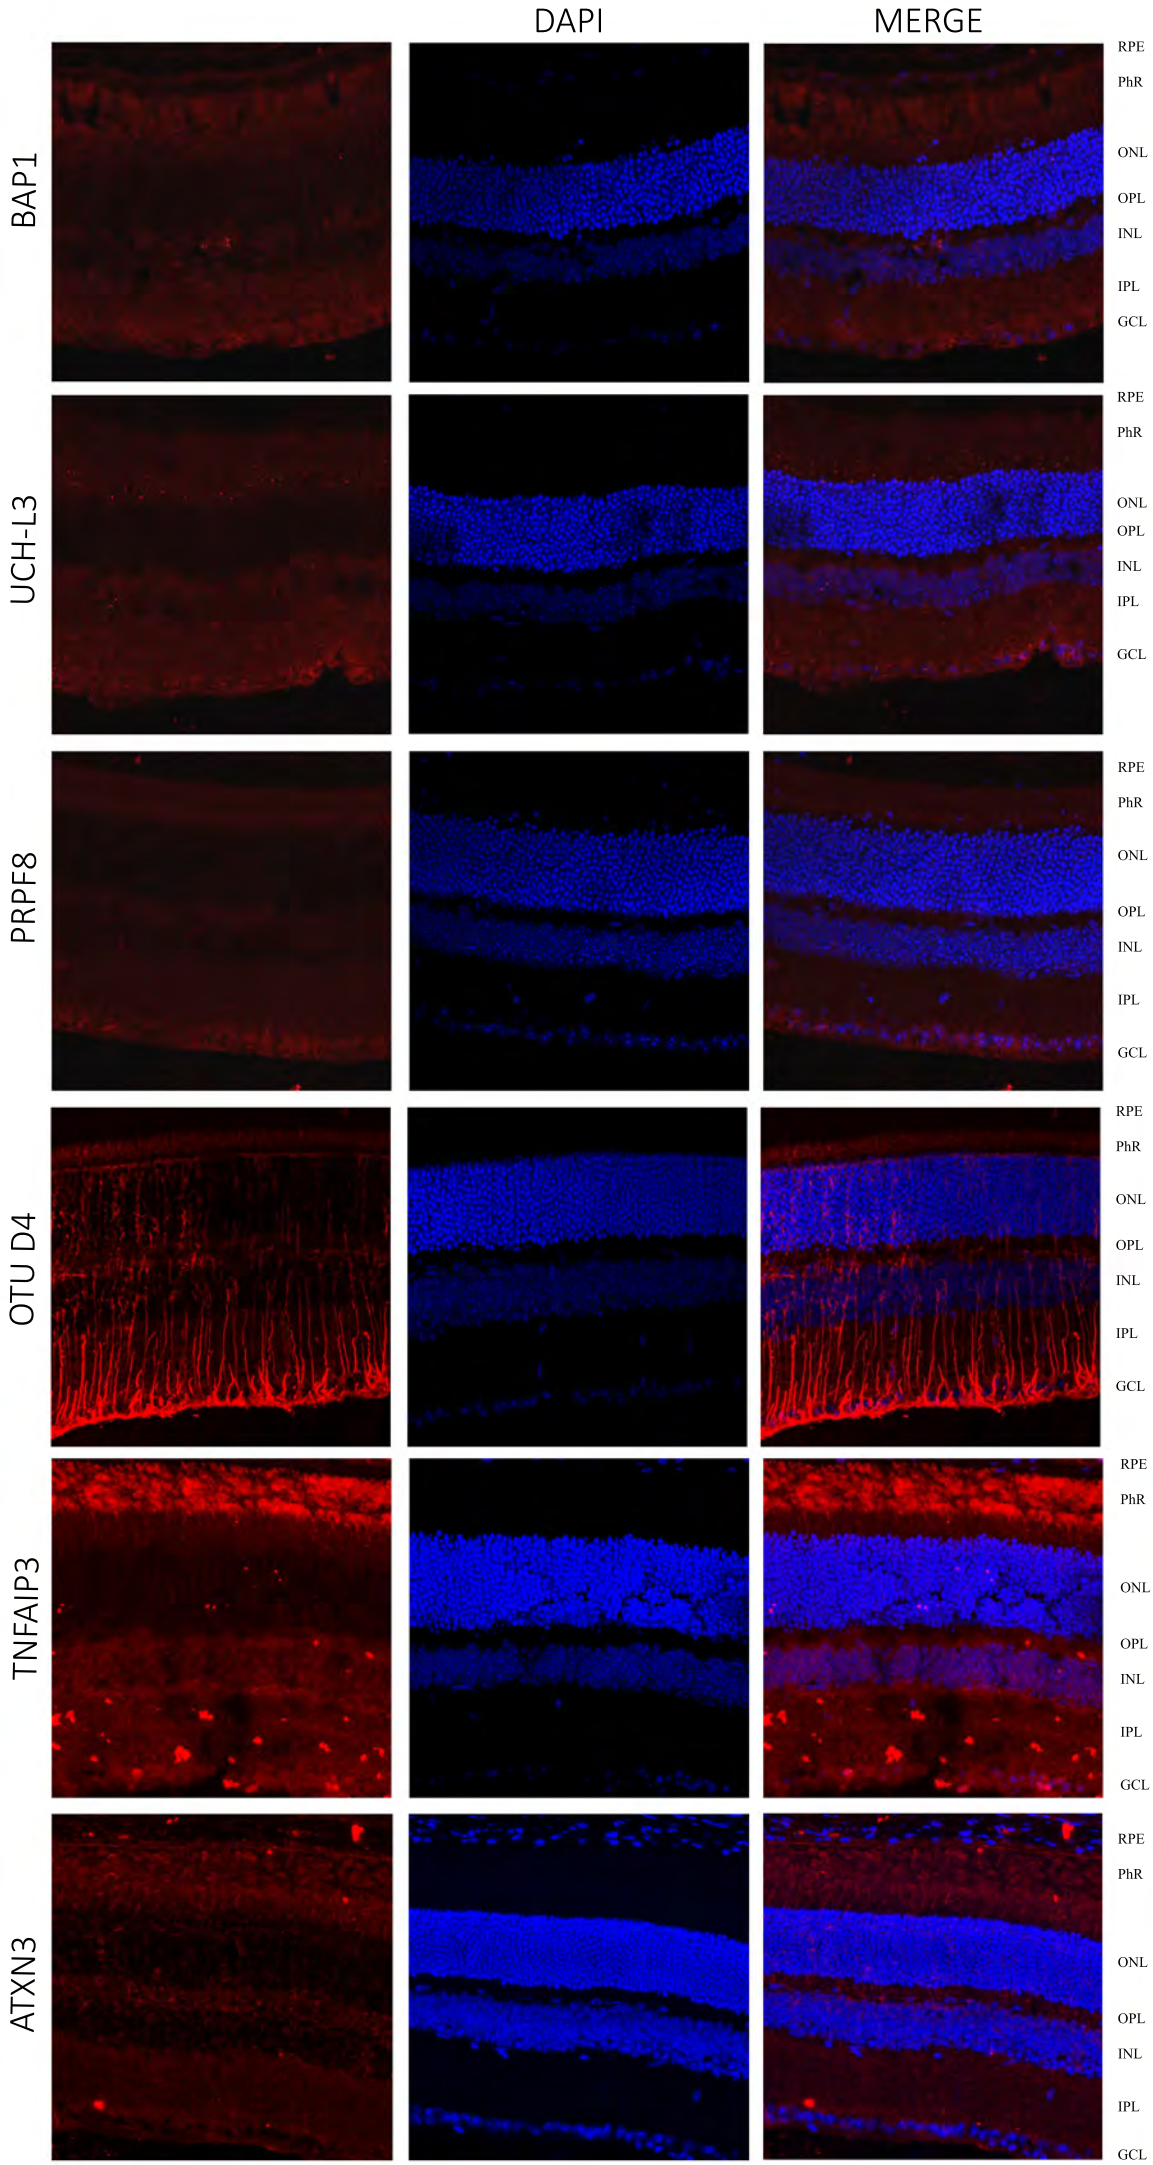

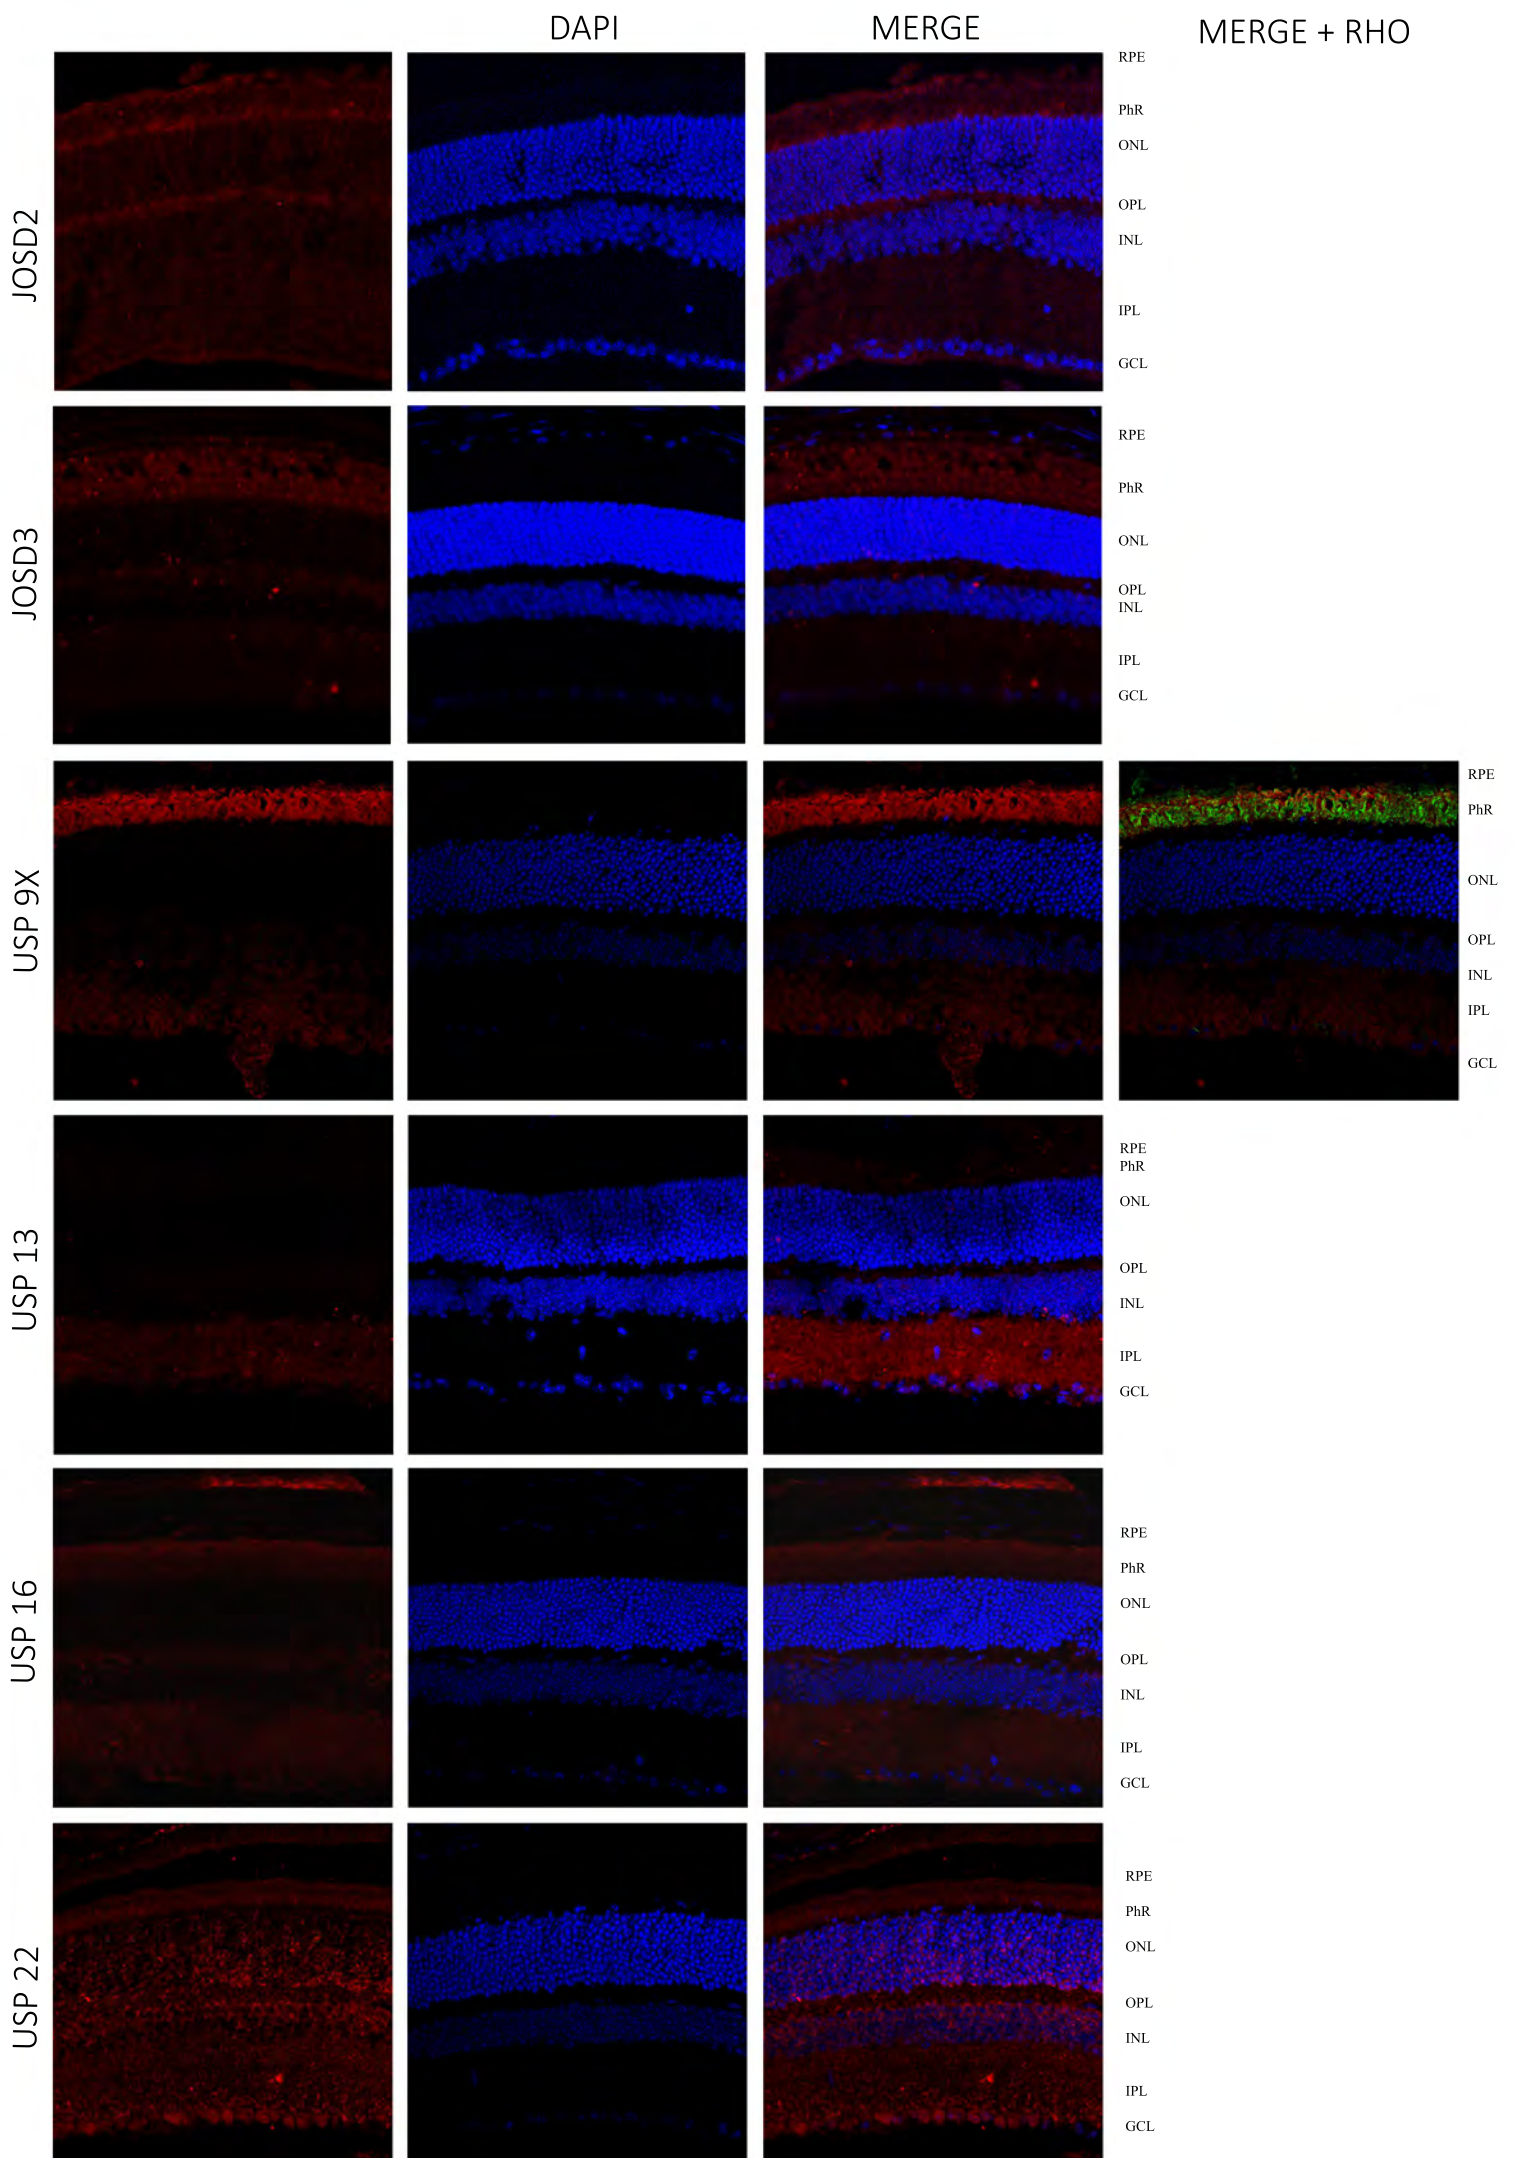

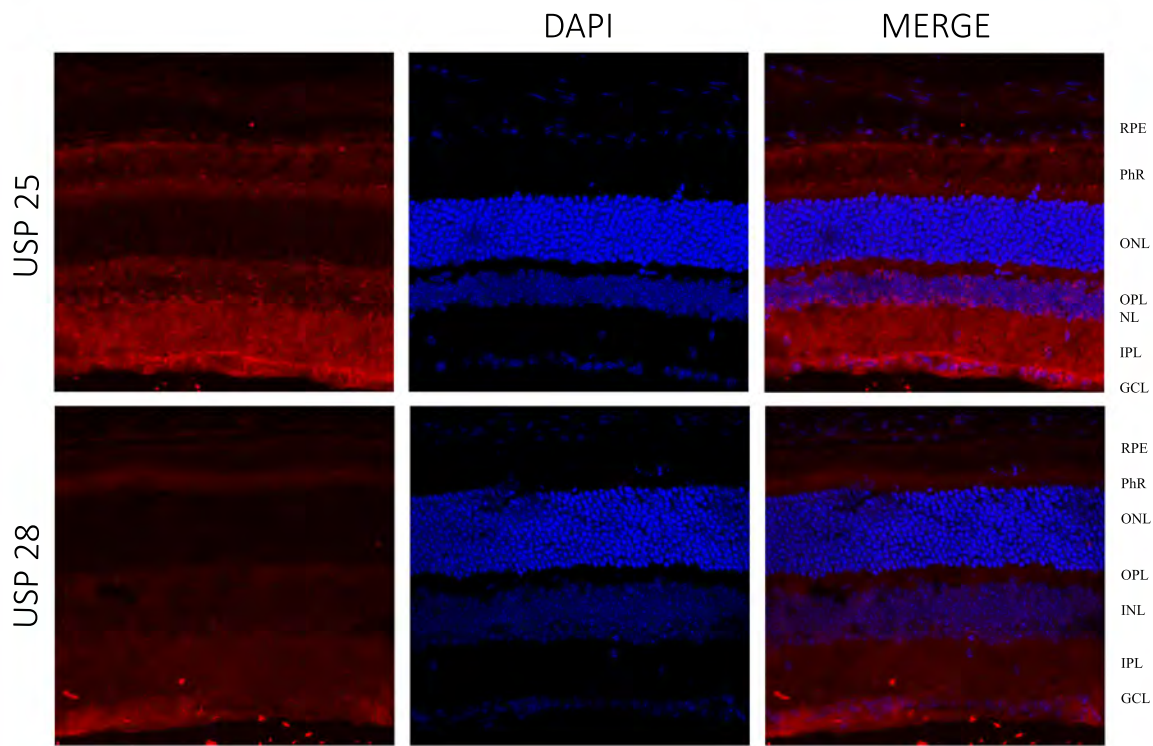

**Supplementary Fig 4. Fluorescent immunohistochemistry** of selected genes on retinal cryosections, using antibodies against a selection of DUB proteins. The figure shows the immunodetection of the indicated DUBs (in red), DAPI counter-staining of the nuclei (in blue) and the merged channels. In USP9X, the extra image shows its co-localization with Rhodopsin in the outer photoreceptor segment, where phototransduction occurs. **RPE**- Retinal pigmented epithelium; **Phr**- Photoreceptor cell layer; **ONL**- Outer nuclear layer; **OPL**. Outer plexiform layer; **INL**- Inner nuclear layer, **IPL**- Inner plexiform layer; **GCL**- Ganglion cell layer.
