# Supplementary material for: Expression Atlas of the Deubiquitinating Enzymes in the Adult Mouse Retina, Their Evolutionary Diversification and Phenotypic Roles
Source: PubMed Central journal article supplement (PMC4774998; doi:10.1371/journal.pone.0150364), 2016-03-02
Supplement: pone.0150364.s007.pdf [file pone.0150364.s007.pdf]

| <i>Real Time qPCR</i> |                  |             |                           | <i>In Situ Hybridization</i> |             |                           |
|-----------------------|------------------|-------------|---------------------------|------------------------------|-------------|---------------------------|
| Family                | Gene             | Orientation | Sequence (5'-3')          | Gene                         | Orientation | Sequence (5'-3')          |
|                       | <i>Gapdh*</i>    | Forward     | tgacaatgaatacggctacagcaa  |                              |             |                           |
|                       |                  | Reverse     | tactccttgaggccatgtagg     |                              |             |                           |
|                       | <i>Rho</i>       | Forward     | gcccttctccaacgtcacag      | <i>Rho*</i>                  | Forward     | gcccttctccaacgtcacag      |
|                       |                  | Reverse     | gcagcttctgtgctgtacgg      |                              | Reverse     | gcagcttctgtgctgtacgg      |
| <b>JAMM</b>           | <i>Amsh</i>      | Forward     | attgttcaagagttcgggaagg    | <i>Amsh</i>                  | Forward     | caccgagactacaatcagctatc   |
|                       |                  | Reverse     | gggggccacatctacacaagg     |                              | Reverse     | gggggccacatctacacaagg     |
|                       | <i>Amsh-like</i> | Forward     | gctgctatgctgaccatacaga    | <i>Amsh-like</i>             | Forward     | gagaaccagagggcccggacta    |
|                       |                  | Reverse     | gacctgaagtaacggcgtgggggtg |                              | Reverse     | gacctgaagtaacggcgtgggggtg |
|                       | <i>Brcc36</i>    | Forward     | gcggcgttctgacaagaaaagg    | <i>Brcc36</i>                | Forward     | aacacaaagactggccgggta     |
|                       |                  | Reverse     | ataccagccaacaactctcatggg  |                              | Reverse     | cgatgcaggaaccaaagcag      |
|                       | <i>Csn5</i>      | Forward     | ttccgggagtggtatggcccag    | <i>Csn5</i>                  | Forward     | ttccgggagtggtatggcccag    |
|                       |                  | Reverse     | cgcccagagatttcttctgttg    |                              | Reverse     | gtgtactaatcaatcccggag     |
|                       | <i>Eif3h</i>     | Forward     | catgttgaagaagtccgattg     | <i>Eif3h</i>                 | Forward     | NP                        |
|                       |                  | Reverse     | gtgcttatcccacagctgac      |                              | Reverse     | NP                        |
|                       | <i>Jamm2</i>     | Forward     | cctgcctgaatgctgtaaagattg  | <i>Jamm2</i>                 | Forward     | cctgcctgaatgctgtaaagattg  |
|                       |                  | Reverse     | agtaagatggctgccagaattctgt |                              | Reverse     | tcctcttacttctcctctgtg     |
|                       | <i>Jamm3</i>     | Forward     | cctgttctcgaggcctgt        | <i>Jamm3</i>                 | Forward     | tccatggcagctcccagctct     |
|                       |                  | Reverse     | tcaatgtctgcaagcaaggagggtg |                              | Reverse     | ctctccaacagcagttcttcc     |
|                       | <i>Mysm1</i>     | Forward     | tgtctctgctctgtgccaactg    | <i>Mysm1</i>                 | Forward     | NP                        |
|                       |                  | Reverse     | cacctctctgctgagaaacca     |                              | Reverse     | NP                        |
|                       | <i>Poh1</i>      | Forward     | acatgggatgtcttatgacttca   | <i>Poh1</i>                  | Forward     | caatgtaaatgatggcttgg      |
|                       |                  | Reverse     | gcgccactgacagctctctacgt   |                              | Reverse     | gccactgacagctctctacg      |
|                       | <i>Prpf8</i>     | Forward     | gcgtggaattaccctctgc       | <i>Prpf8</i>                 | Forward     | NP                        |
|                       |                  | Reverse     | caccgctgcttctgtactg       |                              | Reverse     | NP                        |
|                       | <i>Psm7</i>      | Forward     |                           | <i>Psm7</i>                  | Forward     | NP                        |
|                       |                  | Reverse     |                           | <i>Amsh</i>                  | Reverse     | NP                        |
| <b>MJD</b>            | <i>Atxn</i>      | Forward     | gcctgtggagctatcctcaat     | <i>Atxn</i>                  | Forward     | gcctgtggagctatcctcaat     |
|                       |                  | Reverse     | actcccccttctgccattctc     |                              | Reverse     | gagggcactctgctcttccaga    |
|                       | <i>Josd1</i>     | Forward     | ccatggtctctgcaggtctga     | <i>Josd1</i>                 | Forward     | ccatagtttgggacagagttggg   |
|                       |                  | Reverse     | tgctcaggattaacatgcaagc    |                              | Reverse     | tgctcaggattaacatgcaagc    |
|                       | <i>Josd2</i>     | Forward     | gtgcgaggtgctattggtggt     | <i>Josd2</i>                 | Forward     | gccgacgaaatctgcaagag      |
|                       |                  | Reverse     | gcagcagatcagctgtgttca     |                              | Reverse     | gcagcagatcagctgtgttca     |
|                       | <i>Josd3</i>     | Forward     | gaacaccaccttaaggaatgcttg  | <i>Josd3</i>                 | Forward     | ggcatcgatagagctggagat     |
|                       |                  | Reverse     | gtattgtgctcccactgtca      |                              | Reverse     | gtattgtgctcccactgtca      |
| <b>OTU</b>            | <i>Otub1</i>     | Forward     | agcaggtggacaagcagacctc    | <i>Otub1</i>                 | Forward     | agcaggtggacaagcagacctc    |
|                       |                  | Reverse     | cagtcgaggtagaccacaagg     |                              | Reverse     | cctctgtacatgtctagcgcc     |
|                       | <i>Otub2</i>     | Forward     | gccacttacctgcttctgtgc     | <i>Otub2</i>                 | Forward     | acattctaccattcttcgggatca  |

|            |                |         |                           |                |         |                          |
|------------|----------------|---------|---------------------------|----------------|---------|--------------------------|
|            |                | Reverse | acaggggtggccccatggttatc   |                | Reverse | agaagtcagctcggttcctgatg  |
|            | <b>Otud1</b>   | Forward | catggggcagatgctgaatg      | <b>Otud1</b>   | Forward | agaagctagccctgtacctgg    |
|            |                | Reverse | ggccccagatagtgatcatgg     |                | Reverse | ggccccagatagtgatcatgg    |
|            | <b>Otud3</b>   | Forward | gatgcgaggagaacctga        | <b>Otud3</b>   | Forward | tccacatcgctaccgctac      |
|            |                | Reverse | tgcttcatttctgccctga       |                | Reverse | tgcttcatttctgccctga      |
|            | <b>Otud4</b>   | Forward | cctgtcccgtgtatcctcaga     | <b>Otud4</b>   | Forward | cctgtcccgtgtatcctcaga    |
|            |                | Reverse | catcggtgcaaggacagtcac     |                | Reverse | tccaaaggcaaatccaattctcc  |
|            | <b>Otud5</b>   | Forward | ctgagcacctgaactgcat       | <b>Otud5</b>   | Forward | gcctaccgtcatttaagccagg   |
|            |                | Reverse | tgaaggaggttggcaagagcta    |                | Reverse | tgaaggaggttggcaagagcta   |
|            | <b>Otud6a</b>  | Forward | cgagatggagcagaggcacia     | <b>Otud6a</b>  | Forward | NP                       |
|            |                | Reverse | gctgtaaccgaatccactgc      |                | Reverse | NP                       |
|            | <b>Otud6b</b>  | Forward | ccgggaagaaagatagcagagg    | <b>Otud6b</b>  | Forward | NP                       |
|            |                | Reverse | gggtccaatattgagcaagtt     |                | Reverse | NP                       |
|            | <b>Otud7a</b>  | Forward | tctgacggattcggaacacaag    | <b>Otud7a</b>  | Forward | cttgacagccagagctcc       |
|            |                | Reverse | ttgctaaccgggcatgtcg       |                | Reverse | ggcgacgctcccagcgc        |
|            | <b>Otud7b</b>  | Forward | atgatccagcgttacctgcag     | <b>Otud7b</b>  | Forward | gggcctgatgcacagcaagg     |
|            |                | Reverse | ccctcattcatgatcttctc      |                | Reverse | ccctcattcatgatcttctc     |
|            | <b>Parp11</b>  | Forward | tgctatccccatccagctttg     | <b>Parp11</b>  | Forward | NP                       |
|            |                | Reverse | tgcttccaatttgagtactg      |                | Reverse | NP                       |
|            | <b>Tnfaip3</b> | Forward | ataatggattctgtgagcgttg    | <b>Tnfaip3</b> | Forward | tttgagctgttcagcacgaatac  |
|            |                | Reverse | gaaggcaggcttggcactttc     |                | Reverse | gaaggcaggcttggcactttc    |
|            | <b>Vcpip1</b>  | Forward | atggggtgtcctcaggacctatt   | <b>Vcip1</b>   | Forward | gaaacgaaggaccgaagaatc    |
|            |                | Reverse | ctgcaaacttctgtctctccaa    |                | Reverse | tgctgctgaaagtgtctctta    |
|            | <b>Yod1</b>    | Forward | cagcgtaaactcctgatccaga    | <b>Yod1</b>    | Forward | gaaggaccgagccgagtc       |
|            |                | Reverse | cttcatcagctaattccagtgctg  |                | Reverse | cgggtagccaacgaggattc     |
|            | <b>Zranb1</b>  | Forward | tcccagacctaataacattgaagca | <b>Zranb1</b>  | Forward | ggtggaagtagctctttgatatg  |
|            |                | Reverse | ctccatcgagctctgtcttctc    |                | Reverse | ctccatcgagctctgtcttctc   |
| <b>UCH</b> | <b>Bap1</b>    | Forward | tcctgggagtgaggagtgacat    | <b>Bap1</b>    | Forward | ctgcttctgagcattgaggag    |
|            |                | Reverse | ctgcttctgagcattgaggag     |                | Reverse | gctgtgactcttgagattgtg    |
|            | <b>Uch-11</b>  | Forward | gattaaccccagatgctgaac     | <b>Uch-11</b>  | Forward | cgcttcgccgacgtgctagg     |
|            |                | Reverse | ggatggcactgagcccagag      |                | Reverse | gccccatcgactcgtacaga     |
|            | <b>Uch-13</b>  | Forward | tatgcgcgagtggtactcctctt   | <b>Uch-13</b>  | Forward | tatgcgcgagtggtactcctctt  |
|            |                | Reverse | tcgtccacagcattgctgat      |                | Reverse | ggcatccttaacaacgtctcatc  |
|            | <b>Uch-15</b>  | Forward | agatgtgattcgacaagtgacaaa  | <b>Uch-15</b>  | Forward | gggttcttaccgagctcat      |
|            |                | Reverse | agatgtgattcgacaagtgacaaa  |                | Reverse | agatgtgattcgacaagtgacaaa |
| <b>USP</b> | <b>Usp1</b>    | Forward | ggacaccattaccgacaatag     | <b>Usp1</b>    | Forward | NP                       |
|            |                | Reverse | aacgcctgtttggtcactggat    |                | Reverse | NP                       |
|            | <b>Usp2</b>    | Forward | acctgaagcgattctcagaatc    | <b>Usp2</b>    | Forward | gatggctcccaatgaggtg      |
|            |                | Reverse | ctctcaagtccaggtctctta     |                | Reverse | ctctcaagtccaggtctctta    |
|            | <b>Usp3</b>    | Forward | ccgctggtccattcaatgac      | <b>Usp3</b>    | Forward | NP                       |

|                |         |                         |                |         |                          |
|----------------|---------|-------------------------|----------------|---------|--------------------------|
|                | Reverse | ctggcctgacgctccacataa   |                | Reverse | NP                       |
| <b>Usp4</b>    | Forward | tggtgaggacgatcagggaga   | <b>Usp4</b>    | Forward | NP                       |
|                | Reverse | aggagttcacgaggctgaagg   |                | Reverse | NP                       |
| <b>Usp5</b>    | Forward | cacccatgctggacgaatccg   | <b>Usp5</b>    | Forward | cggatgagcccaaggtagcct    |
|                | Reverse | gccccgctgtttccgatatag   |                | Reverse | gccccgctgtttccgatatag    |
| <b>Usp6</b>    | Forward | cggaagtatctggagctgagc   | <b>Usp6</b>    | Forward | NP                       |
|                | Reverse | cagtccatctttcggccttc    |                | Reverse | NP                       |
| <b>Usp7</b>    | Forward | gatgatgacgtggtatccaggtg | <b>Usp7</b>    | Forward | NP                       |
|                | Reverse | catataggcatttgtcagtgtc  |                | Reverse | NP                       |
| <b>Usp8</b>    | Forward | caacgagcacctggatgacc    | <b>Usp8</b>    | Forward | tatttgaggatcaggaccagc    |
|                | Reverse | acgatgatggactcgttgagc   |                | Reverse | acgatgatggactcgttgagc    |
| <b>Usp9X</b>   | Forward | ttaaaggaaatggacctgggc   | <b>Usp9X</b>   | Forward | tcaagaatgcagctctcgatca   |
|                | Reverse | gctttgcactggaggagacc    |                | Reverse | gctttgcactggaggagacc     |
| <b>Usp9Y</b>   | Forward | gtggactgggctatggaatgg   | <b>Usp9Y</b>   | Forward | NP                       |
|                | Reverse | gtactggaggagaccagttgc   |                | Reverse | NP                       |
| <b>Usp10</b>   | Forward | atcccaggactgtgacagc     | <b>Usp10</b>   | Forward | NP                       |
|                | Reverse | cctggcatcgctcctagtg     |                | Reverse | NP                       |
| <b>Usp11</b>   | Forward | gcctggcagaaccataaacgac  | <b>Usp11</b>   | Forward | NP                       |
|                | Reverse | cattgccacaatcagggcacac  |                | Reverse | NP                       |
| <b>Usp12</b>   | Forward | accagcttcaccggtacacga   | <b>Usp12</b>   | Forward | NP                       |
|                | Reverse | ctgtcagggttggtcgcatct   |                | Reverse | NP                       |
| <b>Usp13</b>   | Forward | cactggactggatcttcagcc   | <b>Usp13</b>   | Forward | tgatgaaccagttgatagacc    |
|                | Reverse | gcctcagacagatgttgga     |                | Reverse | gcctcagacagatgttgga      |
| <b>Usp14</b>   | Forward | atggaattgcatgtgattgac   | <b>Usp14</b>   | Forward | NP                       |
|                | Reverse | gggcatcttgagttcaggcac   |                | Reverse | NP                       |
| <b>Usp15</b>   | Forward | cgcgcagtcacttaaggagca   | <b>Usp15</b>   | Forward | NP                       |
|                | Reverse | ccatcagtgtgtaccagctgac  |                | Reverse | NP                       |
| <b>Usp16</b>   | Forward | agcacttgcgggagaagtgga   | <b>Usp16</b>   | Forward | aagggttggaacaaggttaatttg |
|                | Reverse | ggccatccaaatccttctgtgta |                | Reverse | caggtttccgatttctctct     |
| <b>Usp17L8</b> | Forward | ctgccaatgacaagcccagtc   | <b>Usp17L8</b> | Forward | NP                       |
|                | Reverse | cagggctgcattcaggtagca   |                | Reverse | NP                       |
| <b>Usp18</b>   | Forward | acgcaggagtcctgattgac    | <b>Usp18</b>   | Forward | NP                       |
|                | Reverse | cagaggctttgcgtccttatcaa |                | Reverse | NP                       |
| <b>Usp19</b>   | Forward | cctggctctggtgtggcgga    | <b>Usp19</b>   | Forward | NP                       |
|                | Reverse | cagcagagcctggatcttcagc  |                | Reverse | NP                       |
| <b>Usp20</b>   | Forward | cggcatgaggtgatgtactcct  | <b>Usp20</b>   | Forward | tggtggccttcactctgg       |
|                | Reverse | cagggacgtgcactccttgg    |                | Reverse | cagggacgtgcactccttgg     |
| <b>Usp21</b>   | Forward | ccgagtgggagccaagatacc   | <b>Usp21</b>   | Forward | NP                       |
|                | Reverse | cctgggaggcaaaggtcgtaa   |                | Reverse | NP                       |
| <b>Usp22</b>   | Forward | tctacccattctggccttg     | <b>Usp22</b>   | Forward | NP                       |

|               |         |                         |               |         |                         |
|---------------|---------|-------------------------|---------------|---------|-------------------------|
|               | Reverse | ttcgaggcagctctgtgagag   |               | Reverse | NP                      |
| <b>Usp24</b>  | Forward | gtgtgccagacaggatgtc     | <b>Usp24</b>  | Forward | NP                      |
|               | Reverse | ggttctctcccactctgg      |               | Reverse | NP                      |
| <b>Usp25</b>  | Forward | agagcagccatcaagaagtgc   | <b>Usp25</b>  | Forward | ccaccgggagagccgggtgat   |
|               | Reverse | atcttcaagatcatgtgacgcct |               | Reverse | atcttcaagatcatgtgacgcct |
| <b>Usp26</b>  | Forward | cgcaaggtggatccaacaaagt  | <b>Usp26</b>  | Forward | NP                      |
|               | Reverse | tagtggcctccattgggactg   |               | Reverse | NP                      |
| <b>Usp27X</b> | Forward | tctggactgcctggctcttg    | <b>Usp27X</b> | Forward | NP                      |
|               | Reverse | agtggatgatcctgggatgtg   |               | Reverse | NP                      |
| <b>Usp28</b>  | Forward | catgaggagtactccaggctct  | <b>Usp28</b>  | Forward | catgaggagtactccaggctct  |
|               | Reverse | catgctgaaggcagggtcac    |               | Reverse | acaccaggtaggacaatgcttc  |
| <b>Usp29</b>  | Forward | ccagcgcagaagtgaacaagg   | <b>Usp29</b>  | Forward | NP                      |
|               | Reverse | ttctctgctttgccgcctctg   |               | Reverse | NP                      |
| <b>Usp30</b>  | Forward | ctgccacagtgcctctgcat    | <b>Usp30</b>  | Forward | actggaagtctcagcacct     |
|               | Reverse | aactgcacgtgctcgtgcc     |               | Reverse | aactgcacgtgctcgtgcc     |
| <b>Usp31</b>  | Forward | ctgacagagccagcgtcacct   | <b>Usp31</b>  | Forward | NP                      |
|               | Reverse | acgtgcttgccatccactctg   |               | Reverse | NP                      |
| <b>Usp32</b>  | Forward | caccgactctgctacattctt   | <b>Usp32</b>  | Forward | NP                      |
|               | Reverse | ctcgtgtccgcatcttcttg    |               | Reverse | NP                      |
| <b>Usp33</b>  | Forward | tcctccgactccagttgttc    | <b>Usp33</b>  | Forward | NP                      |
|               | Reverse | gtgtcctcagaactacaagagc  |               | Reverse | NP                      |
| <b>Usp34</b>  | Forward | atggcaggtttgacgactgt    | <b>Usp34</b>  | Forward | tgacaaggagcaactcctgt    |
|               | Reverse | tcggattcatcttcagctagtg  |               | Reverse | tcggattcatcttcagctagtg  |
| <b>Usp35</b>  | Forward | catggtggcctctctggtcaa   | <b>Usp35</b>  | Forward | NP                      |
|               | Reverse | agcccgggaaccgaaacacc    |               | Reverse | NP                      |
| <b>Usp36</b>  | Forward | gcatcgacagctcctccca     | <b>Usp36</b>  | Forward | gcatcgacagctcctccca     |
|               | Reverse | gcaccctcaccctccgagc     |               | Reverse | ctcttcatcctgctgtggctc   |
| <b>Usp37</b>  | Forward | agaggtgctggcagctgtgtt   | <b>Usp37</b>  | Forward | NP                      |
|               | Reverse | gtgtccggactgctggttg     |               | Reverse | NP                      |
| <b>Usp38</b>  | Forward | cagcttcgttaccagtgctca   | <b>Usp38</b>  | Forward | NP                      |
|               | Reverse | gacaaaggcagctgttgctgga  |               | Reverse | NP                      |
| <b>Usp39</b>  | Forward | caagccgtccacaagaacacc   | <b>Usp39</b>  | Forward | NP                      |
|               | Reverse | tgatgaagcacgtggatcctg   |               | Reverse | NP                      |
| <b>Usp40</b>  | Forward | ctgaggacacagctacgcatc   | <b>Usp40</b>  | Forward | NP                      |
|               | Reverse | tcaaggagccagctccatc     |               | Reverse | NP                      |
| <b>Usp41</b>  | Forward |                         | <b>Usp41</b>  | Forward | NP                      |
|               | Reverse |                         |               | Reverse | NP                      |
| <b>Usp42</b>  | Forward | acaacgtcgactccccagct    | <b>Usp42</b>  | Forward | NP                      |
|               | Reverse | tctgaggactcggccccatag   |               | Reverse | NP                      |
| <b>Usp43</b>  | Forward | gactcgggagcctcaacaaca   | <b>Usp43</b>  | Forward | NP                      |

|              |         |                         |              |         |                          |
|--------------|---------|-------------------------|--------------|---------|--------------------------|
|              | Reverse | tggtgaagacaggagagtcgg   |              | Reverse | NP                       |
| <b>Usp44</b> | Forward | gagcccagttccccgtacag    | <b>Usp44</b> | Forward | NP                       |
|              | Reverse | agcatggcaaacggtagagacc  |              | Reverse | NP                       |
| <b>Usp45</b> | Forward | agcctcactgacggcagcg     | <b>Usp45</b> | Forward | agcctcactgacggcagcg      |
|              | Reverse | aggctgcttgaagcgatc      |              | Reverse | gacaggactggactgagcat     |
| <b>Usp46</b> | Forward | accgggtggtcttccctctg    | <b>Usp46</b> | Forward | NP                       |
|              | Reverse | aacgaccacagcaaccaggtc   |              | Reverse | NP                       |
| <b>Usp47</b> | Forward | gtccatgtcacagcttgccatc  | <b>Usp47</b> | Forward | gagagtacagagttaaagtgtgcc |
|              | Reverse | gcttccaacacaagctcctgg   |              | Reverse | gcttccaacacaagctcctgg    |
| <b>Usp48</b> | Forward | gcagcagcaggatgcacaaga   | <b>Usp48</b> | Forward | NP                       |
|              | Reverse | ctgctgcacaacattccgaaca  |              | Reverse | NP                       |
| <b>Usp49</b> | Forward | caggagcctggagctcattca   | <b>Usp49</b> | Forward | NP                       |
|              | Reverse | cccacttcccagaccacatga   |              | Reverse | NP                       |
| <b>Usp50</b> | Forward | actttggagatctggatgggtgg | <b>Usp50</b> | Forward | NP                       |
|              | Reverse | tcactgactcgggtgtcatcaa  |              | Reverse | NP                       |
| <b>Usp51</b> | Forward | gacctgggtagcagtgccaaa   | <b>Usp51</b> | Forward | NP                       |
|              | Reverse | gaaagcaggccacaatcggtaa  |              | Reverse | NP                       |
| <b>Usp52</b> | Forward | cggaagtatctggagctgagc   | <b>Usp52</b> | Forward | NP                       |
|              | Reverse | cagtccatctttcgcccttc    |              | Reverse | NP                       |
| <b>Usp53</b> | Forward | ggagtccatgcatgaccagg    | <b>Usp53</b> | Forward | tgaacaactggacgggtagctg   |
|              | Reverse | tgaacaactggacgggtagctg  |              | Reverse | catctgtgagaactgctgggct   |
| <b>Usp54</b> | Forward | cacgtgcaacctgctagaa     | <b>Usp54</b> | Forward | gaagagagcactgtcgtctgg    |
|              | Reverse | tccagttcagaggtctctctgc  |              | Reverse | tccagttcagaggtctctctgc   |
| <b>Cyld</b>  | Forward | tcccaggcagtgccgcatc     | <b>Cyld</b>  | Forward | tcccaggcagtgccgcatc      |
|              | Reverse | tgcttgatcttcccagctgag   |              | Reverse | gaatggtgaagccattctgacc   |

**Supplementary Table 1.-** Sequences of the primer pairs used in the Reverse Transcriptase Real Time qPCR (left) and *in situ* hybridisation (right) including all the DUB families.

\* *Gapdh*, *Rho* and *Cerkl* genes were used for normalization and reference high and low expression values, respectively.

\*\* Genes whose *in situ* hybridisation did not yield a reproducible pattern.

NP - cases where *in situ* hybridisation was not performed, given the low expression levels detected in the RT-qPCR.
