# Supplementary material for: Expression Atlas of the Deubiquitinating Enzymes in the Adult Mouse Retina, Their Evolutionary Diversification and Phenotypic Roles
Source: PubMed Central journal article supplement (PMC4774998; doi:10.1371/journal.pone.0150364), 2016-03-02
Supplement: pone.0150364.s008.pdf [file pone.0150364.s008.pdf]

**Supplementary Table 2.- Mutant neuronal and retinal phenotypes in different animal models and human listed per DUB family and gene.**

ND- Not determined (The list of bibliography is included at the end)

| JAMM                       |                                                |                    |                                                                                                                                                                                                                              |                        |                                                                                                                                                |                                                                       |                                         |
|----------------------------|------------------------------------------------|--------------------|------------------------------------------------------------------------------------------------------------------------------------------------------------------------------------------------------------------------------|------------------------|------------------------------------------------------------------------------------------------------------------------------------------------|-----------------------------------------------------------------------|-----------------------------------------|
| <i>D. melanogaster</i> [1] |                                                |                    | <i>D. rerio</i> [2]                                                                                                                                                                                                          |                        | <i>M. musculus</i>                                                                                                                             |                                                                       | <i>H. sapiens</i>                       |
| Neuronal phenotype         | Retinal phenotype                              | Neuronal phenotype | Retinal phenotype                                                                                                                                                                                                            | Neuronal phenotype     | Retinal phenotype                                                                                                                              | Neuronal phenotype                                                    | Retinal phenotype                       |
| AMSH                       | ND                                             | ND                 |                                                                                                                                                                                                                              |                        | Loss of neurons in the hippocampus and cerebral cortex [3]                                                                                     | Microcephaly-capillary malformation syndrome (OMIM)                   |                                         |
| AMSH-Like                  |                                                |                    |                                                                                                                                                                                                                              |                        |                                                                                                                                                |                                                                       |                                         |
| BRCC36                     | ND                                             | ND                 |                                                                                                                                                                                                                              |                        |                                                                                                                                                |                                                                       |                                         |
| CSN5                       |                                                |                    |                                                                                                                                                                                                                              |                        | -/- homozygotes die soon after implantation and exhibit growth-retardation, decrease in cell proliferation, and an increase in cell apoptosis. |                                                                       |                                         |
| CSN6                       | Pupal death                                    |                    | 1dpf: <b>cns necrosis</b> , fused somite; 4dpf: small size and short body, small head, pericardial edema, unconsumed egg yolk with no yolk extension, <b>shorten notochord length</b> , dysmorphic axis, underdeveloped tail | 4dpf: small eyes       | -/- homozygotes are embryonic lethal [4]                                                                                                       |                                                                       |                                         |
| EIF3H                      | Pan-neural knockdown is developmentally lethal |                    |                                                                                                                                                                                                                              |                        |                                                                                                                                                |                                                                       |                                         |
| JAMM2                      |                                                |                    |                                                                                                                                                                                                                              |                        |                                                                                                                                                |                                                                       |                                         |
| JAMM3                      |                                                |                    |                                                                                                                                                                                                                              |                        |                                                                                                                                                |                                                                       |                                         |
| MYSM1                      | ND                                             | ND                 | 1dpf: <b>cns necrosis</b> , curled tail developed; 3dpf: narrow head; closed otoliths, abnormal yolk shape with short yolk extension, <b>abnormal notochord shape</b> , slightly curled tail, ratty caudal fin               | 3dpf: funny eyes shape |                                                                                                                                                |                                                                       |                                         |
| POH1                       | Larval death                                   |                    |                                                                                                                                                                                                                              |                        |                                                                                                                                                |                                                                       |                                         |
| PRPF8                      |                                                |                    |                                                                                                                                                                                                                              |                        |                                                                                                                                                | Retinal degeneration in heterozygotes, more severe in homozygotes [4] | autosomal dominant retinitis pigmentosa |
| PSMD7                      |                                                |                    | 1dpf: <b>serious cns necrosis</b> ; 2dpf:                                                                                                                                                                                    |                        | -/- homozygotes are embryonic                                                                                                                  |                                                                       |                                         |

**Supplementary Table 2.- Mutant neuronal and retinal phenotypes in different animal models and human listed per DUB family and gene.**

ND- Not determined (The list of bibliography is included at the end)

|  |                                                                                                                                                                   |            |  |
|--|-------------------------------------------------------------------------------------------------------------------------------------------------------------------|------------|--|
|  | small and short body, underdeveloped head, preicardial edema, <b>shorten notochord</b> , thin trunk, fused somite, shorten and fatty tail, shorten yolk extension | lethal [4] |  |
|--|-------------------------------------------------------------------------------------------------------------------------------------------------------------------|------------|--|

**MJD**

| <i>D. melanogaster</i> |                   | <i>D. rerio</i>    |                                                                                                                                                                                                                                                                  | <i>M. musculus</i>                                       |                   | <i>H. sapiens</i>                  |                   |
|------------------------|-------------------|--------------------|------------------------------------------------------------------------------------------------------------------------------------------------------------------------------------------------------------------------------------------------------------------|----------------------------------------------------------|-------------------|------------------------------------|-------------------|
| Neuronal phenotype     | Retinal phenotype | Neuronal phenotype | Retinal phenotype                                                                                                                                                                                                                                                | Neuronal phenotype                                       | Retinal phenotype | Neuronal phenotype                 | Retinal phenotype |
| <b>ATX3</b>            | ND                | ND                 | 1dpf: <b>cns necrosis</b> , fused somite; 3dpf: reduced body length, dysmorphic axis development, malformed and shorter tail                                                                                                                                     |                                                          |                   | Neurodegenerative disease SCA3 [5] |                   |
| <b>JOSD1</b>           | ND                | ND                 | 1dpf: <b>serious cns necrosis</b> , slightly trunk and tail necrosis, fused somite, shorten tail; 3dpf: small head, strange yolk shape, <b>abnormal notochord shape</b> , irregular floorplate, hemorrhage at tail region, fused somite, shorten and curled tail | 3dpf: funny eyes shape, abnormal retinotectal projection |                   |                                    |                   |
| <b>JOSD2</b>           |                   |                    | 1dpf: abnormal head shape, fused somite; 4dpf: small and short body, strange head shape, tectum enlarged, pericardial edema, unconsumed egg yolk, fat and short yolk extension, dysmorphic axis development, <b>abnormal notochord shape</b> , curled tail       |                                                          |                   |                                    |                   |
| <b>JOSD3</b>           | ND                | ND                 | ND                                                                                                                                                                                                                                                               | ND                                                       |                   |                                    |                   |

**OTU**

| <i>D. melanogaster</i> |                   | <i>D. rerio</i>    |                                                                             | <i>M. musculus</i> |                   | <i>H. sapiens</i>  |                   |
|------------------------|-------------------|--------------------|-----------------------------------------------------------------------------|--------------------|-------------------|--------------------|-------------------|
| Neuronal phenotype     | Retinal phenotype | Neuronal phenotype | Retinal phenotype                                                           | Neuronal phenotype | Retinal phenotype | Neuronal phenotype | Retinal phenotype |
| <b>OTUB1</b>           |                   |                    | 1dpf: <b>cns necrosis</b> , fused somite; 2dpf: small and short body, round |                    |                   |                    |                   |

**Supplementary Table 2.- Mutant neuronal and retinal phenotypes in different animal models and human listed per DUB family and gene.**

ND- Not determined (The list of bibliography is included at the end)

|                |    |    |                                                                                                                                                                                                 |                                                                                                  |                                                                                                                    |
|----------------|----|----|-------------------------------------------------------------------------------------------------------------------------------------------------------------------------------------------------|--------------------------------------------------------------------------------------------------|--------------------------------------------------------------------------------------------------------------------|
|                |    |    | yolk shape with thin yolk extension,<br>thin trunk, curled tail                                                                                                                                 |                                                                                                  |                                                                                                                    |
| <b>OTUB2</b>   | ND | ND | ND                                                                                                                                                                                              | ND                                                                                               |                                                                                                                    |
| <b>OTUD1</b>   | ND | ND | ND                                                                                                                                                                                              | ND                                                                                               |                                                                                                                    |
| <b>OTUD3</b>   | ND | ND | <b>1dpf: slightly cns and trunk necrosis, fused somite; 3dpf: serious dysmorphic development of axis and notochord, curled tail</b>                                                             |                                                                                                  |                                                                                                                    |
| <b>OTUD4</b>   |    |    | 1dpf: underdeveloped trunk; 3dpf: small and short body, reduced pigmentation, <b>cns necrosis</b> , dysmorphic notochord shape, thin trunk, slightly curled tail (Tse)                          | 3dpf: undeveloped eye (Tse). Reduction in size of the optic tecta and cerebellum (Margolin 2013) | Mutated, together with RNF216, in cerebellar ataxia and hypogonadotropic hypogonadism (Gordon Holmes syndrome) [6] |
| <b>OTUD5</b>   |    |    | 1dpf: <b>cns necrosis</b> , fused somite; 3dpf: reduced pigment, small and short body, pericardial edema, thin and short yolk extension, slightly bent body                                     |                                                                                                  | Abnormal embryo turning and developmental patterning [4]                                                           |
| <b>OTUD6a</b>  | ND | ND | ND                                                                                                                                                                                              | ND                                                                                               |                                                                                                                    |
| <b>OTUD6b</b>  |    |    |                                                                                                                                                                                                 |                                                                                                  |                                                                                                                    |
| <b>OTUD7a</b>  | ND | ND |                                                                                                                                                                                                 |                                                                                                  |                                                                                                                    |
| <b>OTUD7b</b>  | ND | ND | ND<br>1dpf: <b>underdeveloped trunk and notochord</b> , fused somite; 3dpf: small and short body, slightly trunk necrosis, fused and curled tail                                                | ND                                                                                               |                                                                                                                    |
| <b>PARPF11</b> |    |    | 1dpf: <b>cns necrosis</b> , fused somite; 4dpf: strange head shape, small and short body, dysmorphic axis shape, thin trunk curled tail, <b>ratty caudal fin</b>                                |                                                                                                  |                                                                                                                    |
| <b>TNFAIP3</b> | ND | ND | 1dpf: trunk and tail necrosis; 4dpf: abnormal head shape, pericardial edema, <b>axis and notochord problems</b> , thin trunk, unconsumed egg yolk with no yolk extension, short and curled tail |                                                                                                  |                                                                                                                    |
| <b>VCPIP1</b>  | ND | ND | 1dpf: <b>underdeveloped trunk and notochord</b> , shorten and fused tail;                                                                                                                       | 4dpf: small eyes                                                                                 |                                                                                                                    |

**Supplementary Table 2.- Mutant neuronal and retinal phenotypes in different animal models and human listed per DUB family and gene.**

ND- Not determined (The list of bibliography is included at the end)

|               |                                             |                                                                                                                                                                                                                                          |  |  |
|---------------|---------------------------------------------|------------------------------------------------------------------------------------------------------------------------------------------------------------------------------------------------------------------------------------------|--|--|
|               |                                             | 4dpf: small and small body, small head, thin trunk, abnormal somite shape, curled and thin tail                                                                                                                                          |  |  |
| <b>YOD1</b>   |                                             | No early phenotype; 3dpf: short and edema body, pericardial edema, unconsumed egg yolk with fat and shorten yolk extension, underdeveloped liver and gut, <b>abnormal axis and notochord shape</b> , fused somite, short and curled tail |  |  |
| <b>ZRANB1</b> | Pharate adult and young adult death (Sokol) | 1dpf: fused somite, curled tail developed; 3dpf: shorten body length, <b>abnormal notochord shape</b> , no yolk extension, curled tail                                                                                                   |  |  |

**UCH**

| <i>D. melanogaster</i> |                   | <i>D. rerio</i>                                                                                                                                          |                           | <i>M. musculus</i>                           |                          | <i>H. sapiens</i>                                                                                                                                                                                                                                                                                                                         |                   |
|------------------------|-------------------|----------------------------------------------------------------------------------------------------------------------------------------------------------|---------------------------|----------------------------------------------|--------------------------|-------------------------------------------------------------------------------------------------------------------------------------------------------------------------------------------------------------------------------------------------------------------------------------------------------------------------------------------|-------------------|
| Neuronal phenotype     | Retinal phenotype | Neuronal phenotype                                                                                                                                       | Retinal phenotype         | Neuronal phenotype                           | Retinal phenotype        | Neuronal phenotype                                                                                                                                                                                                                                                                                                                        | Retinal phenotype |
| <b>BAP1</b>            |                   | 1dpf: <b>serious cns and trunk necrosis</b> , fused somite; 4dpf: hemorrhage in head, unconsumed egg yolk, <b>abnormal notochord shape</b> , curled tail |                           | -/- homozygotes are embryonic lethal(Clague) |                          |                                                                                                                                                                                                                                                                                                                                           |                   |
| <b>UCL1</b>            | ND                |                                                                                                                                                          |                           | Gracile axonal dystrophy [5]                 |                          | Linked to PD and other diseases [5]Childhood-Onset Neurodegeneration With Optic Atrophy: Progressive visual loss due to optic atrophy at around age 5 years, followed by spasticity, cerebellar ataxia, peripheral neuropathy, and myokymia, consistent with systemic neurodegeneration and deficits at the neuromuscular junction (OMIM) |                   |
| <b>UCL3</b>            |                   | 1dpf: slightly trunk necrosis, fused somite; 3dpf: small and short body, pericardial edema, fat and short yolk                                           | 3dpf: reduced eye pigment | Learning and working memory deficits [5]     | Retinal degeneration [5] |                                                                                                                                                                                                                                                                                                                                           |                   |

**Supplementary Table 2.- Mutant neuronal and retinal phenotypes in different animal models and human listed per DUB family and gene.**

ND- Not determined (The list of bibliography is included at the end)

|                        |                                                                                |                                                                                                                                                                                                        |                                                                                                                                                                                                                                |                                                             |                                                                    |                                       |
|------------------------|--------------------------------------------------------------------------------|--------------------------------------------------------------------------------------------------------------------------------------------------------------------------------------------------------|--------------------------------------------------------------------------------------------------------------------------------------------------------------------------------------------------------------------------------|-------------------------------------------------------------|--------------------------------------------------------------------|---------------------------------------|
|                        |                                                                                | extension, <b>abnormal notochord shape</b> , curled and malformed tail                                                                                                                                 |                                                                                                                                                                                                                                |                                                             |                                                                    |                                       |
| <b>UCHL5</b>           | Pupal and pharate adult death (FUNC: NEUROGENESIS)                             | 1dpf: <b>cns necrosis</b> , abnormal head shape, fused somite; 4dpf: thick looking jaw, enlarged otolith, pericardial edema, thin yolk extension, slightly body bent and curled tail, ratty caudal fin |                                                                                                                                                                                                                                | Prenatal lethality, severely abnormal brain development [4] |                                                                    |                                       |
| <b>USP</b>             |                                                                                |                                                                                                                                                                                                        |                                                                                                                                                                                                                                |                                                             |                                                                    |                                       |
| <i>D. melanogaster</i> |                                                                                | <i>D. rerio</i>                                                                                                                                                                                        |                                                                                                                                                                                                                                | <i>M. musculus</i>                                          |                                                                    | <i>H. sapiens</i>                     |
|                        | Neuronal phenotype                                                             | Retinal phenotype                                                                                                                                                                                      | Neuronal phenotype                                                                                                                                                                                                             | Retinal phenotype                                           | Neuronal phenotype                                                 | Retinal phenotype                     |
| <b>USP 1</b>           | (Neuronal) Slower Adults                                                       |                                                                                                                                                                                                        | No early phenotype; 3dpf: <b>abnormal notochord development</b> , body bent, thin trunk and curved tail                                                                                                                        |                                                             | Elevated perinatal lethality, male infertility. Fancony anemia [4] |                                       |
| <b>USP 2</b>           | Pan-neuronal knockdown leads to reduced locomotion and earlier adult death [5] |                                                                                                                                                                                                        |                                                                                                                                                                                                                                |                                                             |                                                                    | Upregulated in high-grade gliomas [5] |
| <b>USP 3</b>           | ND                                                                             | ND                                                                                                                                                                                                     | 1dpf: <b>serious cns necrosis</b> , fused somite; 2dpf: small and short body, underdeveloped head, reduced pigmentation, enlarged tectum, thin trunk, body bent, <b>abnormal notochord development</b> , curled and fused tail | 2dpf: underdeveloped eyes                                   |                                                                    |                                       |
| <b>USP 4</b>           | ND                                                                             | ND                                                                                                                                                                                                     | ND<br>1dpf: <b>cns necrosis</b> ; 2dpf: small and short body, small head, unconsumed yolk with thin extension, notochord problem, curled tail                                                                                  | ND<br>2dpf: small eyes                                      |                                                                    |                                       |
| <b>USP 5</b>           | Pupal death(Sokol)                                                             |                                                                                                                                                                                                        | 1dpf: <b>slightly cns necrosis</b> , undeveloped trunk, fused tail; 2dpf: small and short body, abnormal head shape, percardial edema, dysmorphic axis shape, shorten notochord, trunk and tail necrosis,                      | 2dpf: underdeveloped small eyes                             | -/- homozygotes are embryonic lethal [4]                           |                                       |

**Supplementary Table 2.- Mutant neuronal and retinal phenotypes in different animal models and human listed per DUB family and gene.**

ND- Not determined (The list of bibliography is included at the end)

|               |                     | short and curled tail |                                                                                                                                                                                                                                                                   |                  |                                                                                                                                                                                                                                        |
|---------------|---------------------|-----------------------|-------------------------------------------------------------------------------------------------------------------------------------------------------------------------------------------------------------------------------------------------------------------|------------------|----------------------------------------------------------------------------------------------------------------------------------------------------------------------------------------------------------------------------------------|
| USP 6         | ND                  | ND                    | ND                                                                                                                                                                                                                                                                | ND               |                                                                                                                                                                                                                                        |
| <b>USP 7</b>  | Pharate adult death |                       | 1dpf: <b>slightly cns damage</b> ; 2dpf: small and short body, small head, reduced pigment, "bud" on head, <b>abnormal notochord development</b> , fused tail, ratty caudal fin, ; 3dpf: close otoliths, slightly percardial edema, unconsumed yolk in pear shape | 2dpf: small eyes | -/- homozygotes are embryonic lethal(Clague). Brain specific knockdown causes brain malformation and neonatal lethality, due at least in part to p53-dependent mechanisms. [5]                                                         |
| <b>USP 8</b>  | Larval death        |                       | 1dpf: <b>serious cns and trunk necrosis</b> , fused somite; 3dpf: small body, <b>slightly cns necrosis</b> , percardial edema, <b>abnormal notochord development</b> , fused somite, curled tail with ratty caudal fin                                            |                  | Brain development deficiencies in brain targeted knockout (Hausp fl/fl nes-Cre) mice                                                                                                                                                   |
| <b>USP 9X</b> | Fat facets          |                       | ND                                                                                                                                                                                                                                                                | ND               | reduction in axonal length and arborisation, decrease in neuronal migration [7]<br><br>Involved in neuronal fate specification and NMJ function.(Sokol?) patients with multiple myeloma overexpressing USP9X have a poor prognosis [8] |
| <b>USP 9Y</b> | ND                  | ND                    | ND                                                                                                                                                                                                                                                                | ND               |                                                                                                                                                                                                                                        |
| <b>USP 10</b> |                     |                       | 1dpf: <b>cns necrosis</b> , fused somite; 2dpf: small and short body, reduced pigment, thin trunk, body bent ventrally, curled tail, ratty caudal fin                                                                                                             |                  |                                                                                                                                                                                                                                        |
| <b>USP 11</b> | ND                  | ND                    |                                                                                                                                                                                                                                                                   |                  |                                                                                                                                                                                                                                        |
| <b>USP 12</b> | ND                  | ND                    | 1dpf: <b>cns and tail necrosis</b> ; 4dpf: slightly edema body, percardial edema, unconsumed yolk, abnormal yolk shape with thin yolk extension, <b>dysmorphic notochord and axis shape</b> , curled tail                                                         |                  |                                                                                                                                                                                                                                        |
| <b>USP 13</b> | ND                  | ND                    | 1dpf: <b>cns necrosis</b> , fused somite; 2dpf: small and short body, reduced pigment, thin trunk, <b>dysmorphic notochord shape</b> , percardial edema, slightly curled tail                                                                                     |                  |                                                                                                                                                                                                                                        |
| <b>USP 14</b> | (Neuronal)Slower    |                       |                                                                                                                                                                                                                                                                   |                  | Mutations in intron leads to                                                                                                                                                                                                           |

**Supplementary Table 2.- Mutant neuronal and retinal phenotypes in different animal models and human listed per DUB family and gene.**

ND- Not determined (The list of bibliography is included at the end)

|               |                                |    |                                                                                                                                                                                                                                                                                                               |                                         |                                                                                                                                           |                                                                                                                                                                                                        |
|---------------|--------------------------------|----|---------------------------------------------------------------------------------------------------------------------------------------------------------------------------------------------------------------------------------------------------------------------------------------------------------------|-----------------------------------------|-------------------------------------------------------------------------------------------------------------------------------------------|--------------------------------------------------------------------------------------------------------------------------------------------------------------------------------------------------------|
|               | adults, early death<br>(Sokol) |    |                                                                                                                                                                                                                                                                                                               |                                         | reduced USP14 levels. Tremors, abnormal brain morphology, altered synaptic transmission and increased apoptosis. [4]                      |                                                                                                                                                                                                        |
| <b>USP 15</b> | ND                             | ND | 1dpf: <b>cns necrosis</b> , fused somite;<br>2dpf: <b>underdeveloped head and trunk, axis and notochord problems</b> , pericardial edema, fused somite, short and slightly curled tail;<br>4dpf: unshaped head; body edema, round shape unconsumed yolk, underdeveloped liver and gut, tail slightly necrosis | 2dpf: small eyes<br>4dpf: unshaped eyes |                                                                                                                                           |                                                                                                                                                                                                        |
| <b>USP 16</b> | ND                             | ND |                                                                                                                                                                                                                                                                                                               |                                         | reduces the self-renewal of hematopoietic stem cells and the expansion of mammary epithelial cells, neuroprogenitors, and fibroblasts [9] | overexpression of USP16 reduces the expansion of normal fibroblasts and postnatal neural progenitors, whereas downregulation of USP16 partially rescues the proliferation defects of Down syndrome [9] |
| <b>USP 17</b> | ND                             | ND | ND                                                                                                                                                                                                                                                                                                            | ND                                      |                                                                                                                                           |                                                                                                                                                                                                        |
| <b>USP 18</b> | ND                             | ND | 1dpf: <b>cns and tail necrosis</b> , fused somite; 2dpf: underdeveloped trunk, tail necrosis; 3dpf: small and short body, small head, thin trunk, <b>shorten notochord length</b> , serious pericardial edema, unconsumed yolk with short yolk extensions shorten, short and curved tail                      | 3dpf: small eyes                        | Tremors, seizures, abnormal nervous system, death [4]                                                                                     |                                                                                                                                                                                                        |
| <b>USP 19</b> | ND                             | ND | 1dpf: <b>slightly cns necrosis</b> , fused somite; 2dpf: small and short body, reduced pigmentation, small head, <b>shorten notochord length</b> , pericardial edema, short and curled tail with slightly necrosis (with "buds"),                                                                             | 2dpf: small eyes                        |                                                                                                                                           |                                                                                                                                                                                                        |
| <b>USP 20</b> | Earlier adulthood death        |    | 1dpf: <b>cns necrosis</b> , fused somite; 2dpf: small and short body, reduced pigment, "buds" on the pericardial and yolk area, tail necrosis; 3dpf: small head, pericardial edema, "buds" (necrosis) on the pericardial                                                                                      | 3dpf: small eyes                        |                                                                                                                                           |                                                                                                                                                                                                        |

**Supplementary Table 2.- Mutant neuronal and retinal phenotypes in different animal models and human listed per DUB family and gene.**

ND- Not determined (The list of bibliography is included at the end)

|               |                                                                                                                      |                                              |                                                                                                                                                                                                                                 |                     |                                           |
|---------------|----------------------------------------------------------------------------------------------------------------------|----------------------------------------------|---------------------------------------------------------------------------------------------------------------------------------------------------------------------------------------------------------------------------------|---------------------|-------------------------------------------|
|               |                                                                                                                      |                                              | area, unconsumed yolk with short extension, curled tail with slightly necrosis at the end                                                                                                                                       |                     |                                           |
| <b>USP 21</b> | ND                                                                                                                   | ND                                           | 1dpf: mild necrosis throughout the body; 3dpf: underdeveloped head, small head, <b>abnormal axis and notochord development</b> , trunk necrosis, pericardial edema, roundly and unconsumed yolk with no yolk extension, no tail | 3dpf: small eyes    |                                           |
| <b>USP 22</b> |                                                                                                                      | Axonal projection of photoreceptor cells [5] | No early phenotype at 1dpf; 2dpf: inflated brain                                                                                                                                                                                |                     | -/- homozygotes are embryonic lethal [4]  |
| <b>USP 24</b> | ND                                                                                                                   | ND                                           | 1dpf: body necrosis, fused somite; 2dpf: small and short body, <b>cns necrosis became more seriously, abnormal notochord development</b> , thin trunk, fat and short yolk extension, curled short tail with necrosis            | 2dpf: abnormal eyes | May be involved in PD susceptibility [5]  |
| <b>USP 25</b> | ND                                                                                                                   | ND                                           | 1dpf: <b>cns and tail necrosis</b> ; 2dpf: small and short body, unshaped head, <b>cns necrosis</b> , bulging forebrain, thin trunk, fused somite, tail necrosis                                                                | 2dpf: unshaped eyes | Overexpressed in Down Syndrome brains [5] |
| <b>USP 26</b> | ND                                                                                                                   | ND                                           | ND                                                                                                                                                                                                                              | ND                  |                                           |
| <b>USP 27</b> | ND                                                                                                                   | ND                                           | ND                                                                                                                                                                                                                              | ND                  |                                           |
| <b>USP 28</b> | ND                                                                                                                   | ND                                           | 1dpf: head damage, fused somite; 2dpf: <b>serious cns necrosis</b> , reduced pigment, <b>notochord and axis underdevelopment</b> , thin trunk, shorten and curved tail                                                          | ND                  |                                           |
| <b>USP 29</b> | ND                                                                                                                   | ND                                           | ND                                                                                                                                                                                                                              | ND                  |                                           |
| <b>USP 30</b> | Knockdown of Usp30 in dopaminergic neurons protects flies against paraquat toxicity in vivo, ameliorating defects in |                                              |                                                                                                                                                                                                                                 |                     |                                           |



**Supplementary Table 2.- Mutant neuronal and retinal phenotypes in different animal models and human listed per DUB family and gene.**

ND- Not determined (The list of bibliography is included at the end)

|               |                                                                         |    |                                                                                                                                                                                                      |                  |                                                                                                                           |
|---------------|-------------------------------------------------------------------------|----|------------------------------------------------------------------------------------------------------------------------------------------------------------------------------------------------------|------------------|---------------------------------------------------------------------------------------------------------------------------|
|               | dopamine levels,<br>motor function, and<br>organismal survival.<br>[10] |    |                                                                                                                                                                                                      |                  |                                                                                                                           |
| <b>USP 31</b> | ND                                                                      | ND |                                                                                                                                                                                                      |                  |                                                                                                                           |
| <b>USP 32</b> |                                                                         |    |                                                                                                                                                                                                      |                  |                                                                                                                           |
| <b>USP 33</b> | ND                                                                      | ND | 1dpf: <b>cns necrosis</b> ; 3dpf: small and short body, small head, <b>notochord development problem</b> , curled tail                                                                               | 3dpf: small eyes | in cultured mouse embryonic commissural axons and was required for growth cone collapse in response to Slit exposure [11] |
| <b>USP 34</b> | Pan neuronal knockdown is developmentally lethal [5]                    |    |                                                                                                                                                                                                      |                  |                                                                                                                           |
| <b>USP 35</b> |                                                                         | ND | ND                                                                                                                                                                                                   |                  |                                                                                                                           |
| <b>USP 36</b> | Larval death                                                            |    | 1dpf: <b>slightly cns necrosis</b> ; 3dpf: small and short body, reduced pigment, very thin trunk, pericardial edema, funny yolk shape with fat yolk extension, curled tail                          |                  |                                                                                                                           |
| <b>USP 37</b> | ND                                                                      | ND | 1dpf: <b>cns necrosis</b> ; 3dpf: small and short body, small head, tectum enlargement, pericardial edema, round yolk shape, thin trunk, <b>notochord problem</b> , shorten and slightly curled tail | 3dpf: small eyes |                                                                                                                           |
| <b>USP 38</b> | ND                                                                      | ND |                                                                                                                                                                                                      |                  |                                                                                                                           |
| <b>USP 39</b> | Larval death                                                            |    | 1dpf: <b>cns and tail necrosis</b> , 2dpf: small and short body, small head, slightly pericardial edema, dysmorphic notochord development, fused somite, curled tail                                 | 2dpf: small eyes |                                                                                                                           |
| <b>USP 40</b> | ND                                                                      | ND |                                                                                                                                                                                                      |                  | May be involved in PD susceptibility [5]                                                                                  |
| <b>USP 41</b> | ND                                                                      | ND | ND                                                                                                                                                                                                   | ND               |                                                                                                                           |
| <b>USP 42</b> | ND                                                                      | ND | 1dpf: <b>slightly cns necrosis</b> , fused somite; 3dpf: inflated hindbrain, slightly pericardial edema and body bent                                                                                |                  |                                                                                                                           |
| <b>USP 43</b> |                                                                         |    | 1dpf: <b>slightly cns necrosis</b> , fused somite; 2dpf: small and short body,                                                                                                                       | 2dpf: small eyes |                                                                                                                           |

**Supplementary Table 2.- Mutant neuronal and retinal phenotypes in different animal models and human listed per DUB family and gene.**

ND- Not determined (The list of bibliography is included at the end)

|               |                                            |    |                                                                                                                                                                                                                                                                                                        |                          |                                              |
|---------------|--------------------------------------------|----|--------------------------------------------------------------------------------------------------------------------------------------------------------------------------------------------------------------------------------------------------------------------------------------------------------|--------------------------|----------------------------------------------|
|               |                                            |    | reduced pigment, small head, <b>bulging forebrain</b> , pericardial edema, curled tail                                                                                                                                                                                                                 |                          |                                              |
| <b>USP 44</b> | ND                                         | ND | 1dpf: <b>abnormal development, cns and tail necrosis</b> , fused somite; 3dpf: very small and short body, underdeveloped head and trunk, <b>shorten notochord length</b> , axis development problem, serious pericardial edema, unconsumed round yolk with short yolk extension, short and curled tail |                          |                                              |
| <b>USP 45</b> | Pupal, pharate adult and young adult death |    | 1dpf: <b>cns necrosis</b> ; 2dpf: reduced pigment, a bit smaller head, close otolith distance, slightly pericardial edema, thin yolk extension                                                                                                                                                         | 2dpf: reduced eyes       |                                              |
| <b>USP 46</b> |                                            |    |                                                                                                                                                                                                                                                                                                        |                          | role in the GABAergic neurotransmission [12] |
| <b>USP 47</b> |                                            |    |                                                                                                                                                                                                                                                                                                        |                          |                                              |
| <b>USP 48</b> | ND                                         | ND | No early phenotype; 3dpf: small and short body, reduced pigment, small head, pericardial edema, body bent, slightly tail necrosis                                                                                                                                                                      | 3dpf: small eyes         |                                              |
| <b>USP 49</b> | ND                                         | ND | ND                                                                                                                                                                                                                                                                                                     | ND                       |                                              |
| <b>USP 50</b> | ND                                         | ND | ND                                                                                                                                                                                                                                                                                                     | ND                       |                                              |
| <b>USP 51</b> | ND                                         | ND | ND                                                                                                                                                                                                                                                                                                     | ND                       |                                              |
| <b>USP 52</b> |                                            |    | ND                                                                                                                                                                                                                                                                                                     | ND                       |                                              |
| <b>USP 53</b> | ND                                         | ND | No early phenotype at 1dpf; 3dpf: small and short body, reduced pigment, small head, <b>inflated brain, notochord problem</b> , curled tail                                                                                                                                                            | 3dpf: small eyes         |                                              |
| <b>USP 54</b> | Pharate adult and young adult death        |    |                                                                                                                                                                                                                                                                                                        |                          |                                              |
| <b>CYLD</b>   |                                            |    | 1dpf: <b>cns necrosis</b> ; 2dpf: small and short body, strange head shape, <b>thinner mid/hidbrain boundary, midbrain enlargement</b> , round yolk shape with thin extension, slightly axis and notochord problem, curled tail<br><br>1dpf: <b>cns necrosis</b> , trunk necrosis;                     | 1dpf: small eyes (CylDb) |                                              |

**Supplementary Table 2.- Mutant neuronal and retinal phenotypes in different animal models and human listed per DUB family and gene.**

ND- Not determined (The list of bibliography is included at the end)

|  |                                                                                                                                               |  |  |
|--|-----------------------------------------------------------------------------------------------------------------------------------------------|--|--|
|  | 2dpf: small and short body, small head, necrosis spread through the body, pericardial edema, thin trunk, <b>notochord problem</b> , body bent |  |  |
|--|-----------------------------------------------------------------------------------------------------------------------------------------------|--|--|

**Supplementary Table 2.- Mutant neuronal and retinal phenotypes in different animal models and human listed per DUB family and gene.**

ND- Not determined (The list of bibliography is included at the end)

**BIBLIOGRAPHY**

1. Tsou W-L, Sheedlo MJ, Morrow ME, Blount JR, McGregor KM, Das C, et al. Systematic analysis of the physiological importance of deubiquitinating enzymes. *PLoS One*. 2012;7: e43112. doi:10.1371/journal.pone.0043112
2. Tse WKF, Eisenhaber B, Ho SHK, Ng Q, Eisenhaber F, Jiang Y-J. Genome-wide loss-of-function analysis of deubiquitylating enzymes for zebrafish development. *BMC Genomics*. 2009;10: 637. doi:10.1186/1471-2164-10-637
3. Ishii N, Owada Y, Yamada M, Miura S, Murata K, Asao H, et al. Loss of neurons in the hippocampus and cerebral cortex of AMSH-deficient mice. *Mol Cell Biol*. 2001;21: 8626–37. doi:10.1128/MCB.21.24.8626-8637.2001
4. Clague MJ, Barsukov I, Coulson JM, Liu H, Rigden DJ, Urbé S. Deubiquitylases from genes to organism. *Physiol Rev*. 2013;93: 1289–315. doi:10.1152/physrev.00002.2013
5. Ristic G, Tsou W-L, Todi S V. An optimal ubiquitin-proteasome pathway in the nervous system: the role of deubiquitinating enzymes. *Front Mol Neurosci*. 2014;7: 72. doi:10.3389/fnmol.2014.00072
6. Margolin DH, Kousi M, Chan Y-M, Lim ET, Schmähmann JD, Hadjivassiliou M, et al. Ataxia, dementia, and hypogonadotropism caused by disordered ubiquitination. *N Engl J Med*. 2013;368: 1992–2003. doi:10.1056/NEJMoa1215993
7. Homan CC, Kumar R, Nguyen LS, Haan E, Raymond FL, Abidi F, et al. Mutations in USP9X are associated with X-linked intellectual disability and disrupt neuronal cell migration and growth. *Am J Hum Genet*. Elsevier; 2014;94: 470–8. doi:10.1016/j.ajhg.2014.02.004
8. Schwickart M, Huang X, Lill JR, Liu J, Ferrando R, French DM, et al. Deubiquitinase USP9X stabilizes MCL1 and promotes tumour cell survival. *Nature*. 2010;463: 103–7. doi:10.1038/nature08646
9. Adorno M, Sikandar S, Mitra SS, Kuo A, Nicolis Di Robilant B, Haro-Acosta V, et al. Usp16 contributes to somatic stem-cell defects in Down's syndrome. *Nature*. Nature Publishing Group, a division of Macmillan Publishers Limited. All Rights Reserved.; 2013;501: 380–4. doi:10.1038/nature12530

**Supplementary Table 2.- Mutant neuronal and retinal phenotypes in different animal models and human listed per DUB family and gene.**

ND- Not determined (The list of bibliography is included at the end)

10. Bingol B, Tea JS, Phu L, Reichelt M, Bakalarski CE, Song Q, et al. The mitochondrial deubiquitinase USP30 opposes parkin-mediated mitophagy. *Nature*. 2014;510: 370–5. doi:10.1038/nature13418
11. Yuasa-Kawada J, Kinoshita-Kawada M, Wu G, Rao Y, Wu JY. Midline crossing and Slit responsiveness of commissural axons require USP33. *Nat Neurosci*. 2009;12: 1087–1089. doi:10.1038/nn.2382
12. Tomida S, Mamiya T, Sakamaki H, Miura M, Aosaki T, Masuda M, et al. Usp46 is a quantitative trait gene regulating mouse immobile behavior in the tail suspension and forced swimming tests. *Nat Genet*. 2009;41: 688–695. doi:10.1038/ng.344
